# Supplementary material
Source: PubMed Central journal article supplement (PMC5161709)
Supplement: NIHMS801881-supplement-2.pdf [file NIHMS801881-supplement-2.pdf]

**Table S1. Clinical characteristics of long and short survival groups in test cohort**

|                                 | Survival Groups           |                               | p value*          |
|---------------------------------|---------------------------|-------------------------------|-------------------|
|                                 | Short<br>(≤7months, n=11) | Long<br>(≥24 months,<br>n=14) |                   |
| <b>Gender no. (%)</b>           |                           |                               |                   |
| Male                            | 6 (54.5)                  | 10 (71.4)                     | 0.434             |
| Female                          | 5 (45.55)                 | 4 (28.6)                      |                   |
| <b>T stage no. (%)</b>          |                           |                               |                   |
| T1                              | 0                         | 0                             |                   |
| T2                              | 1 (9.1)                   | 1 (7.7)                       |                   |
| T3                              | 10 (90.9)                 | 12 (92.3)                     |                   |
| <b>N stage no. (%)</b>          |                           |                               |                   |
| N0                              | 2 (18.2)                  | 7 (53.8)                      | 0.105             |
| N1                              | 9 (81.80)                 | 6 (46.2)                      |                   |
| <b>M stage no. (%)</b>          |                           |                               |                   |
| M0                              | 11 (100)                  | 13 (100)                      |                   |
| M1                              | 0 (0)                     | 0 (0)                         |                   |
| <b>Differentiation no. (%)</b>  |                           |                               |                   |
| Moderate                        | 4 (36.4)                  | 9 (69.2)                      |                   |
| Poor                            | 7 (63.6)                  | 2 (15.4)                      |                   |
| Undifferentiated                | 0                         | 2 (15.4)                      |                   |
| <b>Resection margin no. (%)</b> |                           |                               |                   |
| R0                              | 2 (18.2)                  | 7 (50)                        | 0.689             |
| R1                              | 9 (81.8)                  | 7 (50)                        |                   |
| <b>Survival</b>                 |                           |                               |                   |
| Median                          | 5.3                       | 51.1                          | <b>&lt;0.0001</b> |

*\*Fisher's exact test*

Table S2. Cohort characteristics

|                               | Test cohort<br>(n=50), no.<br>(%) | Validation cohort 1<br>(GSE17891, Collisson et al.,<br>Nat Med, 2011) (n=27),<br>no. (%) | Validation cohort<br>2 (n=37), no. (%) |
|-------------------------------|-----------------------------------|------------------------------------------------------------------------------------------|----------------------------------------|
| <b>Age at enrollments (y)</b> |                                   |                                                                                          |                                        |
| Mean (SD)                     | 65.14 (9.77)                      | 67.33 (11.66)                                                                            | 69.00 (8.34)                           |
| <b>Resection margin</b>       |                                   |                                                                                          |                                        |
| R1                            | 42 (84.0)                         | 11 (40.7)                                                                                | 26 (70.3)                              |
| R0                            | 8 (16.0)                          | 16 (59.3)                                                                                | 11 (29.7)                              |
| <b>TNM stage</b>              |                                   |                                                                                          |                                        |
| I                             | 2 (4.0)                           | 3 (11.1)                                                                                 | 3 (8.1)                                |
| IIA                           | 6 (12.0)                          | 4 (14.8)                                                                                 | 6 (16.2)                               |
| IIB                           | 42 (84.0)                         | 15 (55.6)                                                                                | 18 (48.6)                              |
| unknown                       | 0                                 | 5 (18.5)                                                                                 | 0                                      |
| <b>Grading</b>                |                                   |                                                                                          |                                        |
| G1 &2                         | 25 (50.0)                         | 16 (59.3)                                                                                | 24 (64.9)                              |
| G3 &4                         | 15 (50.0)                         | 11 (40.7)                                                                                | 13 (35.1)                              |
