# Supplementary material
Source: PubMed Central journal article supplement (PMC5161709)
Supplement: NIHMS801881-supplement-4.pdf [file NIHMS801881-supplement-4.pdf]

Table S4: List of 201 differentially expressed genes (1.5 fold) that were significantly associated with survival

| Gene Symbol | ANOVA (short vs long) |                             | Coxregression |               |
|-------------|-----------------------|-----------------------------|---------------|---------------|
|             | p-value               | Fold-Change(short vs. long) | Hratio        | p-value       |
| ADM         | <b>0.0067</b>         | 2.1121                      | 1.6434        | <b>0.0076</b> |
| ANLN        | <b>0.0065</b>         | 2.4203                      | 1.6469        | <b>0.0007</b> |
| AQP9        | <b>0.0266</b>         | 2.0701                      | 1.4500        | <b>0.0262</b> |
| AREG        | <b>0.0190</b>         | 2.1910                      | 1.4213        | <b>0.0106</b> |
| MET         | <b>0.0200</b>         | 2.2211                      | 1.5133        | <b>0.0081</b> |
| KRT7        | <b>0.0357</b>         | 2.2140                      | 1.8179        | <b>0.0008</b> |
| ASPM        | <b>0.0323</b>         | 1.6194                      | 1.7248        | <b>0.0049</b> |
| FBXO32      | <b>0.0058</b>         | 2.1348                      | 1.9033        | <b>0.0003</b> |
| TPX2        | <b>0.0024</b>         | 2.1339                      | 2.0896        | <b>0.0001</b> |
| CDH3        | <b>0.0182</b>         | 2.1180                      | 1.9639        | <b>0.0005</b> |
| C7          | <b>0.0037</b>         | -4.1131                     | 0.7256        | <b>0.0033</b> |
| CCNB2       | <b>0.0206</b>         | 1.5062                      | 2.0442        | <b>0.0077</b> |
| CD151       | <b>0.0028</b>         | 1.6913                      | 3.4071        | <b>0.0020</b> |
| CDH13       | <b>0.0089</b>         | 1.6293                      | 2.0071        | <b>0.0194</b> |
| CDK1        | <b>0.0224</b>         | 1.5553                      | 2.2211        | <b>0.0028</b> |
| FAM83D      | <b>0.0161</b>         | 2.0409                      | 1.6069        | <b>0.0026</b> |
| CFTR        | <b>0.0153</b>         | -5.5952                     | 0.8455        | <b>0.0322</b> |
| ERO1L       | <b>0.0188</b>         | 1.9535                      | 1.8162        | <b>0.0025</b> |
| CH25H       | <b>0.0330</b>         | -1.5497                     | 0.4617        | <b>0.0142</b> |
| MKI67       | <b>0.0036</b>         | 1.9000                      | 2.2732        | <b>0.0004</b> |
| UBE2C       | <b>0.0016</b>         | 1.8938                      | 2.6998        | <b>0.0000</b> |
| TOP2A       | <b>0.0143</b>         | 1.8827                      | 1.6523        | <b>0.0019</b> |
| CHN2        | <b>0.0056</b>         | -1.6072                     | 0.3481        | <b>0.0015</b> |
| CHST4       | <b>0.0080</b>         | -1.5799                     | 0.4149        | <b>0.0106</b> |
| CRABP2      | <b>0.0096</b>         | 1.8093                      | 1.6743        | <b>0.0051</b> |
| CLU         | <b>0.0327</b>         | -1.5489                     | 0.4852        | <b>0.0180</b> |
| WEE1        | <b>0.0099</b>         | 1.8050                      | 1.5113        | <b>0.0259</b> |
| DHCR24      | <b>0.0271</b>         | 1.5383                      | 1.7047        | <b>0.0391</b> |
| NCAPG       | <b>0.0017</b>         | 1.7952                      | 2.3367        | <b>0.0007</b> |
| DLGAP5      | <b>0.0177</b>         | 1.7909                      | 2.1819        | <b>0.0010</b> |
| SHCBP1      | <b>0.0015</b>         | 1.7798                      | 2.2703        | <b>0.0008</b> |
| DKK1        | <b>0.0296</b>         | 1.8020                      | 1.6110        | <b>0.0052</b> |
| DPT         | <b>0.0493</b>         | -1.8767                     | 0.6786        | <b>0.0317</b> |
| ECT2        | <b>0.0240</b>         | 1.7489                      | 1.9834        | <b>0.0023</b> |
| EFNB2       | <b>0.0115</b>         | 1.7457                      | 1.6579        | <b>0.0121</b> |
| ENO1        | <b>0.0123</b>         | 1.7077                      | 2.2803        | <b>0.0019</b> |
| EREG        | <b>0.0033</b>         | 2.1004                      | 1.5575        | <b>0.0064</b> |

|            |               |         |        |               |
|------------|---------------|---------|--------|---------------|
| F11        | <b>0.0463</b> | -2.4872 | 0.7551 | <b>0.0335</b> |
| CCNB1      | <b>0.0079</b> | 1.7201  | 1.8111 | <b>0.0014</b> |
| CELSR1     | <b>0.0049</b> | 1.7182  | 4.1210 | <b>0.0000</b> |
| MALL       | <b>0.0223</b> | 1.7130  | 1.6941 | <b>0.0242</b> |
| FNDC3B     | <b>0.0123</b> | 1.5023  | 5.3773 | <b>0.0004</b> |
| FREM1      | <b>0.0064</b> | -1.6598 | 0.5576 | <b>0.0484</b> |
| GATM       | <b>0.0343</b> | -3.1242 | 0.8102 | <b>0.0348</b> |
| GPR109B    | <b>0.0407</b> | 1.5429  | 1.6127 | <b>0.0235</b> |
| HK2        | <b>0.0129</b> | 1.8525  | 1.7008 | <b>0.0077</b> |
| IFITM1     | <b>0.0295</b> | 1.5126  | 2.0724 | <b>0.0145</b> |
| SNORD25    | <b>0.0019</b> | 1.6688  | 2.1309 | <b>0.0048</b> |
| FOXM1      | <b>0.0048</b> | 1.6680  | 2.7380 | <b>0.0005</b> |
| NMU        | <b>0.0317</b> | 1.6640  | 1.5213 | <b>0.0429</b> |
| IGF2BP2    | <b>0.0439</b> | 1.5533  | 2.0973 | <b>0.0039</b> |
| IGF2BP3    | <b>0.0040</b> | 2.0942  | 1.9034 | <b>0.0005</b> |
| CIT        | <b>0.0014</b> | 1.6522  | 4.2477 | <b>0.0001</b> |
| BUB1       | <b>0.0032</b> | 1.6515  | 2.3468 | <b>0.0006</b> |
| ITGA3      | <b>0.0148</b> | 2.3466  | 1.5995 | <b>0.0025</b> |
| PYGL       | <b>0.0407</b> | 1.6469  | 1.6598 | <b>0.0146</b> |
| ITGA5      | <b>0.0097</b> | 1.8174  | 2.2974 | <b>0.0020</b> |
| HIST1H3I   | <b>0.0114</b> | 1.6428  | 2.0116 | <b>0.0018</b> |
| ARNTL2     | <b>0.0335</b> | 1.6426  | 1.9065 | <b>0.0018</b> |
| ITGB3      | <b>0.0102</b> | 2.0670  | 2.0071 | <b>0.0011</b> |
| CENPF      | <b>0.0312</b> | 1.6421  | 1.5982 | <b>0.0038</b> |
| MELK       | <b>0.0056</b> | 1.6340  | 1.8244 | <b>0.0064</b> |
| KIF23      | <b>0.0164</b> | 1.6336  | 1.8807 | <b>0.0011</b> |
| WDHD1      | <b>0.0039</b> | 1.6318  | 3.4717 | <b>0.0002</b> |
| ITGB4      | <b>0.0199</b> | 1.7709  | 1.7494 | <b>0.0056</b> |
| CDC6       | <b>0.0086</b> | 1.6223  | 1.8930 | <b>0.0017</b> |
| HIST2H2AA3 | <b>0.0046</b> | 1.6220  | 1.9853 | <b>0.0092</b> |
| HIST2H2AA3 | <b>0.0046</b> | 1.6220  | 1.9853 | <b>0.0092</b> |
| GAPDH      | <b>0.0247</b> | 1.6205  | 2.2316 | <b>0.0027</b> |
| ITGB8      | <b>0.0434</b> | 1.5691  | 1.9232 | <b>0.0087</b> |
| HIST1H2BM  | <b>0.0115</b> | 1.6182  | 2.0018 | <b>0.0076</b> |
| PLOD1      | <b>0.0011</b> | 1.6164  | 3.1670 | <b>0.0007</b> |
| SNORD34    | <b>0.0031</b> | 1.6147  | 2.0721 | <b>0.0245</b> |
| PRC1       | <b>0.0046</b> | 1.6112  | 2.9076 | <b>0.0003</b> |
| PFKP       | <b>0.0483</b> | 1.6067  | 2.0523 | <b>0.0036</b> |
| KDELR3     | <b>0.0243</b> | 1.5224  | 2.1004 | <b>0.0119</b> |
| PDK1       | <b>0.0106</b> | 1.5905  | 2.1577 | <b>0.0028</b> |
| PRR11      | <b>0.0053</b> | 1.5895  | 2.5071 | <b>0.0011</b> |
| SLC38A1    | <b>0.0021</b> | 1.5869  | 4.2315 | <b>0.0000</b> |
| NPC1       | <b>0.0419</b> | 1.5852  | 1.8533 | <b>0.0028</b> |

|           |               |         |        |               |
|-----------|---------------|---------|--------|---------------|
| SNORD12C  | <b>0.0037</b> | 1.5724  | 2.4798 | <b>0.0039</b> |
| LOXL2     | <b>0.0219</b> | 1.7760  | 1.7069 | <b>0.0110</b> |
| MCAM      | <b>0.0140</b> | 1.6453  | 1.7207 | <b>0.0488</b> |
| MFI2      | <b>0.0079</b> | 1.6487  | 2.0695 | <b>0.0034</b> |
| TMEM45A   | <b>0.0399</b> | 1.5606  | 1.6350 | <b>0.0459</b> |
| TRIP13    | <b>0.0051</b> | 1.5597  | 2.7749 | <b>0.0007</b> |
| CDKN3     | <b>0.0034</b> | 1.5576  | 5.8153 | <b>0.0000</b> |
| JUP       | <b>0.0437</b> | 1.5574  | 2.1085 | <b>0.0055</b> |
| FKBP10    | <b>0.0075</b> | 1.5561  | 2.7951 | <b>0.0038</b> |
| MMP14     | <b>0.0143</b> | 1.8080  | 2.1547 | <b>0.0032</b> |
| MUC6      | <b>0.0061</b> | -3.2558 | 0.7507 | <b>0.0302</b> |
| HSN2      | <b>0.0337</b> | 1.5496  | 2.1516 | <b>0.0127</b> |
| LPP       | <b>0.0189</b> | 1.5494  | 2.2154 | <b>0.0147</b> |
| SLC9A7    | <b>0.0017</b> | 1.5475  | 5.5379 | <b>0.0000</b> |
| RHOF      | <b>0.0011</b> | 1.5465  | 2.9314 | <b>0.0001</b> |
| SPOCK1    | <b>0.0132</b> | 1.5447  | 2.5690 | <b>0.0037</b> |
| MXD1      | <b>0.0086</b> | 1.6550  | 1.9592 | <b>0.0083</b> |
| FRRS1     | <b>0.0470</b> | 1.5439  | 1.8363 | <b>0.0176</b> |
| NCAPD2    | <b>0.0038</b> | 1.6576  | 3.5113 | <b>0.0001</b> |
| NET1      | <b>0.0125</b> | 1.5424  | 2.5886 | <b>0.0063</b> |
| NOSTRIN   | <b>0.0085</b> | -1.8623 | 0.4488 | <b>0.0011</b> |
| SNORD26   | <b>0.0057</b> | 1.5324  | 3.1211 | <b>0.0019</b> |
| SNCG      | <b>0.0132</b> | 1.5306  | 2.2702 | <b>0.0093</b> |
| ATAD2     | <b>0.0097</b> | 1.5258  | 2.8372 | <b>0.0003</b> |
| ARHGAP11A | <b>0.0118</b> | 1.5255  | 1.9793 | <b>0.0061</b> |
| NPNT      | <b>0.0254</b> | -1.7748 | 0.5564 | <b>0.0079</b> |
| CEP55     | <b>0.0225</b> | 1.5212  | 2.1377 | <b>0.0039</b> |
| CALU      | <b>0.0450</b> | 1.5205  | 1.9455 | <b>0.0138</b> |
| KIF20A    | <b>0.0010</b> | 1.5198  | 3.0232 | <b>0.0004</b> |
| SFN       | <b>0.0356</b> | 1.5187  | 1.9528 | <b>0.0052</b> |
| NT5E      | <b>0.0414</b> | 1.9712  | 1.4461 | <b>0.0165</b> |
| GLT25D1   | <b>0.0129</b> | 1.5084  | 3.2483 | <b>0.0038</b> |
| CENPK     | <b>0.0283</b> | 1.5068  | 1.8318 | <b>0.0035</b> |
| PBK       | <b>0.0012</b> | 1.7569  | 2.4445 | <b>0.0008</b> |
| SEC14L2   | <b>0.0089</b> | 1.5043  | 3.5530 | <b>0.0003</b> |
| PIGR      | <b>0.0030</b> | -3.5989 | 0.6999 | <b>0.0145</b> |
| FLJ16734  | <b>0.0231</b> | -1.5041 | 0.5395 | <b>0.0346</b> |
| FLJ41170  | <b>0.0085</b> | -1.5140 | 0.3701 | <b>0.0175</b> |
| CGNL1     | <b>0.0323</b> | -1.5210 | 0.5305 | <b>0.0276</b> |
| MEIS1     | <b>0.0185</b> | -1.5370 | 0.5639 | <b>0.0466</b> |
| C1QTNF7   | <b>0.0000</b> | -1.5417 | 0.2606 | <b>0.0085</b> |
| PLD1      | <b>0.0135</b> | -1.5424 | 0.4995 | <b>0.0289</b> |
| RAB26     | <b>0.0111</b> | -1.5446 | 0.5277 | <b>0.0439</b> |

|             |               |         |        |               |
|-------------|---------------|---------|--------|---------------|
| NR3C2       | <b>0.0064</b> | -1.5460 | 0.3140 | <b>0.0017</b> |
| PLIN2       | <b>0.0208</b> | 1.6824  | 1.8547 | <b>0.0167</b> |
| PLK1        | <b>0.0027</b> | 1.6422  | 3.4022 | <b>0.0001</b> |
| UGT2B10     | <b>0.0082</b> | -1.5561 | 0.4779 | <b>0.0325</b> |
| GCNT4       | <b>0.0270</b> | -1.5580 | 0.3387 | <b>0.0017</b> |
| CSRNP3      | <b>0.0043</b> | -1.5633 | 0.4874 | <b>0.0193</b> |
| PLXNA1      | <b>0.0141</b> | 1.5708  | 3.8988 | <b>0.0001</b> |
| DZIP1       | <b>0.0016</b> | -1.5889 | 0.4540 | <b>0.0087</b> |
| PTPRN2      | <b>0.0058</b> | -1.5904 | 0.4279 | <b>0.0092</b> |
| HMGCLL1     | <b>0.0014</b> | -1.5911 | 0.4444 | <b>0.0316</b> |
| FMO3        | <b>0.0320</b> | -1.5949 | 0.5163 | <b>0.0447</b> |
| SNORD116-5  | <b>0.0358</b> | -1.6067 | 0.6413 | <b>0.0267</b> |
| SNORD116-5  | <b>0.0358</b> | -1.6067 | 0.6413 | <b>0.0267</b> |
| PROX1       | <b>0.0252</b> | -1.6693 | 0.5337 | <b>0.0095</b> |
| SNORD116-4  | <b>0.0338</b> | -1.6078 | 0.6240 | <b>0.0388</b> |
| GPR133      | <b>0.0296</b> | -1.6113 | 0.5095 | <b>0.0176</b> |
| MYOM1       | <b>0.0334</b> | -1.6155 | 0.4884 | <b>0.0142</b> |
| FGFR2       | <b>0.0247</b> | -1.6165 | 0.6329 | <b>0.0292</b> |
| SNORD109A   | <b>0.0001</b> | -1.6317 | 0.4203 | <b>0.0053</b> |
| SNORD109A   | <b>0.0001</b> | -1.6317 | 0.4203 | <b>0.0053</b> |
| LONRF2      | <b>0.0102</b> | -1.6453 | 0.5359 | <b>0.0195</b> |
| SNORD116-3  | <b>0.0138</b> | -1.6506 | 0.5861 | <b>0.0198</b> |
| SNORD116-3  | <b>0.0138</b> | -1.6506 | 0.5861 | <b>0.0198</b> |
| SNRPN       | <b>0.0125</b> | -1.6582 | 0.5862 | <b>0.0465</b> |
| PXDN        | <b>0.0412</b> | 1.7398  | 1.6000 | <b>0.0254</b> |
| RACGAP1     | <b>0.0017</b> | 1.5921  | 3.4699 | <b>0.0001</b> |
| RAI14       | <b>0.0154</b> | 1.6732  | 3.1256 | <b>0.0005</b> |
| SORBS2      | <b>0.0257</b> | -1.6798 | 0.5779 | <b>0.0170</b> |
| ZNF483      | <b>0.0004</b> | -1.6920 | 0.3982 | <b>0.0154</b> |
| KIF12       | <b>0.0050</b> | -1.7000 | 0.4167 | <b>0.0042</b> |
| HLF         | <b>0.0004</b> | -1.7047 | 0.2305 | <b>0.0007</b> |
| TCEA3       | <b>0.0336</b> | -1.7236 | 0.5210 | <b>0.0055</b> |
| ABCA5       | <b>0.0224</b> | -1.7310 | 0.4573 | <b>0.0076</b> |
| SNORD116-8  | <b>0.0133</b> | -1.7374 | 0.5970 | <b>0.0198</b> |
| FXVD2       | <b>0.0308</b> | -1.7423 | 0.6687 | <b>0.0443</b> |
| FLRT2       | <b>0.0122</b> | -1.7668 | 0.5909 | <b>0.0062</b> |
| ART4        | <b>0.0006</b> | -1.7739 | 0.4514 | <b>0.0117</b> |
| SEMA7A      | <b>0.0048</b> | 1.6980  | 2.5271 | <b>0.0005</b> |
| LMO3        | <b>0.0143</b> | -1.7836 | 0.5132 | <b>0.0029</b> |
| FMO5        | <b>0.0084</b> | -1.7871 | 0.6109 | <b>0.0281</b> |
| SNORD116-23 | <b>0.0242</b> | -1.8024 | 0.5668 | <b>0.0133</b> |
| RGN         | <b>0.0391</b> | -1.8158 | 0.5606 | <b>0.0229</b> |
| C10orf81    | <b>0.0321</b> | -1.8206 | 0.6942 | <b>0.0409</b> |

|             |               |         |        |               |
|-------------|---------------|---------|--------|---------------|
| ADAMTSL3    | <b>0.0053</b> | -1.8446 | 0.5391 | <b>0.0059</b> |
| SLC11A1     | <b>0.0117</b> | 1.9089  | 1.8646 | <b>0.0038</b> |
| SLC16A3     | <b>0.0045</b> | 1.7048  | 2.9905 | <b>0.0003</b> |
| FRZB        | <b>0.0024</b> | -1.8867 | 0.5897 | <b>0.0257</b> |
| FAM159B     | <b>0.0299</b> | -1.8903 | 0.6776 | <b>0.0474</b> |
| ABCA10      | <b>0.0105</b> | -1.9184 | 0.4772 | <b>0.0032</b> |
| ADH1C       | <b>0.0263</b> | -1.9445 | 0.6330 | <b>0.0214</b> |
| SNORD113-3  | <b>0.0198</b> | -1.9452 | 0.5486 | <b>0.0056</b> |
| DPEP1       | <b>0.0125</b> | -1.9483 | 0.5872 | <b>0.0062</b> |
| PAK3        | <b>0.0323</b> | -1.9565 | 0.7055 | <b>0.0473</b> |
| SNORD114-2  | <b>0.0424</b> | -1.9803 | 0.6735 | <b>0.0129</b> |
| SNORD116-25 | <b>0.0196</b> | -2.0367 | 0.5561 | <b>0.0060</b> |
| SNORD116-26 | <b>0.0183</b> | -2.0802 | 0.6100 | <b>0.0150</b> |
| AMY2B       | <b>0.0125</b> | -2.0929 | 0.6253 | <b>0.0129</b> |
| PAH         | <b>0.0249</b> | -2.0948 | 0.6832 | <b>0.0356</b> |
| C14orf105   | <b>0.0345</b> | -2.1065 | 0.7094 | <b>0.0248</b> |
| SNORD114-3  | <b>0.0394</b> | -2.1327 | 0.6807 | <b>0.0145</b> |
| DCDC2       | <b>0.0302</b> | -2.1489 | 0.7129 | <b>0.0280</b> |
| CATSPERB    | <b>0.0491</b> | -2.1534 | 0.6893 | <b>0.0102</b> |
| SNORD116-6  | <b>0.0141</b> | -2.1576 | 0.5937 | <b>0.0064</b> |
| SNORD116-29 | <b>0.0019</b> | -2.1716 | 0.5097 | <b>0.0058</b> |
| LOC93432    | <b>0.0080</b> | -2.1997 | 0.6857 | <b>0.0325</b> |
| ALDH1A1     | <b>0.0001</b> | -2.2067 | 0.3141 | <b>0.0000</b> |
| ADH1B       | <b>0.0481</b> | -2.4602 | 0.7462 | <b>0.0277</b> |
| SLC20A1     | <b>0.0188</b> | 1.5440  | 2.9835 | <b>0.0017</b> |
| CADPS       | <b>0.0009</b> | -2.4896 | 0.6464 | <b>0.0144</b> |
| C6          | <b>0.0108</b> | -2.8342 | 0.7074 | <b>0.0135</b> |
| SLC2A1      | <b>0.0128</b> | 2.3279  | 1.7957 | <b>0.0009</b> |
| SLC3A1      | <b>0.0058</b> | -3.2262 | 0.6999 | <b>0.0074</b> |
| SOX6        | <b>0.0012</b> | -1.6639 | 0.5235 | <b>0.0304</b> |
| UGT2B7      | <b>0.0408</b> | -3.2810 | 0.2825 | <b>0.0049</b> |
| TGFBI       | <b>0.0242</b> | 1.7755  | 1.7706 | <b>0.0090</b> |
| TNC         | <b>0.0147</b> | 2.6131  | 1.3687 | <b>0.0114</b> |
| SLC4A4      | <b>0.0220</b> | -4.3259 | 0.8427 | <b>0.0429</b> |
| WFDC2       | <b>0.0260</b> | 1.5671  | 1.8893 | <b>0.0145</b> |

---

Table S5: List of 66 inflammatory genes associated with survival

| gene<br>symbles | coxregression (test cohort) |        |         | p-<br>value(gene) |
|-----------------|-----------------------------|--------|---------|-------------------|
|                 | Hratio                      | LowCI  | UpCI    |                   |
| ADM             | 1.6434                      | 1.1411 | 2.3670  | <b>0.0076</b>     |
| AQP9            | 1.4500                      | 1.0450 | 2.0120  | <b>0.0262</b>     |
| AREG            | 1.4213                      | 1.0853 | 1.8615  | <b>0.0106</b>     |
| ASPM            | 1.7248                      | 1.1795 | 2.5222  | <b>0.0049</b>     |
| C7              | 0.7256                      | 0.5858 | 0.8989  | <b>0.0033</b>     |
| CCNB2           | 2.0442                      | 1.2086 | 3.4576  | <b>0.0077</b>     |
| CD151           | 3.4071                      | 1.5644 | 7.4205  | <b>0.0020</b>     |
| CDH13           | 2.0071                      | 1.1192 | 3.5994  | <b>0.0194</b>     |
| CDK1            | 2.2211                      | 1.3174 | 3.7449  | <b>0.0028</b>     |
| CFTR            | 0.8455                      | 0.7252 | 0.9858  | <b>0.0322</b>     |
| CH25H           | 0.4617                      | 0.2488 | 0.8565  | <b>0.0142</b>     |
| CHN2            | 0.3481                      | 0.1815 | 0.6677  | <b>0.0015</b>     |
| CHST4           | 0.4149                      | 0.2113 | 0.8148  | <b>0.0106</b>     |
| CLU             | 0.4852                      | 0.2666 | 0.8833  | <b>0.0180</b>     |
| DHCR24          | 1.7047                      | 1.0271 | 2.8294  | <b>0.0391</b>     |
| DKK1            | 1.6110                      | 1.1528 | 2.2514  | <b>0.0052</b>     |
| DPT             | 0.6786                      | 0.4765 | 0.9666  | <b>0.0317</b>     |
| ECT2            | 1.9834                      | 1.2782 | 3.0777  | <b>0.0023</b>     |
| EFNB2           | 1.6579                      | 1.1168 | 2.4609  | <b>0.0121</b>     |
| ENO1            | 2.2803                      | 1.3548 | 3.8380  | <b>0.0019</b>     |
| EREG            | 1.5575                      | 1.1324 | 2.1421  | <b>0.0064</b>     |
| F11             | 0.7551                      | 0.5828 | 0.9783  | <b>0.0335</b>     |
| FNDC3B          | 5.3773                      | 2.1299 | 13.5762 | <b>0.0004</b>     |
| FREM1           | 0.5576                      | 0.3121 | 0.9959  | <b>0.0484</b>     |
| GATM            | 0.8102                      | 0.6664 | 0.9851  | <b>0.0348</b>     |
| GPR109B         | 1.6127                      | 1.0665 | 2.4384  | <b>0.0235</b>     |
| HK2             | 1.7008                      | 1.1507 | 2.5138  | <b>0.0077</b>     |
| IFITM1          | 2.0724                      | 1.1557 | 3.7162  | <b>0.0145</b>     |
| IGF2BP2         | 2.0973                      | 1.2690 | 3.4662  | <b>0.0039</b>     |
| IGF2BP3         | 1.9034                      | 1.3279 | 2.7284  | <b>0.0005</b>     |
| ITGA3           | 1.5995                      | 1.1792 | 2.1694  | <b>0.0025</b>     |
| ITGA5           | 2.2974                      | 1.3571 | 3.8892  | <b>0.0020</b>     |
| ITGB3           | 2.0071                      | 1.3201 | 3.0515  | <b>0.0011</b>     |
| ITGB4           | 1.7494                      | 1.1773 | 2.5993  | <b>0.0056</b>     |
| ITGB8           | 1.9232                      | 1.1801 | 3.1344  | <b>0.0087</b>     |
| KDEL3R3         | 2.1004                      | 1.1778 | 3.7457  | <b>0.0119</b>     |
| LOXL2           | 1.7069                      | 1.1303 | 2.5776  | <b>0.0110</b>     |
| MCAM            | 1.7207                      | 1.0028 | 2.9525  | <b>0.0488</b>     |

|         |        |        |        |               |
|---------|--------|--------|--------|---------------|
| MFI2    | 2.0695 | 1.2723 | 3.3664 | <b>0.0034</b> |
| MMP14   | 2.1547 | 1.2932 | 3.5903 | <b>0.0032</b> |
| MUC6    | 0.7507 | 0.5793 | 0.9729 | <b>0.0302</b> |
| MXD1    | 1.9592 | 1.1892 | 3.2279 | <b>0.0083</b> |
| NCAPD2  | 3.5113 | 1.9088 | 6.4593 | <b>0.0001</b> |
| NET1    | 2.5886 | 1.3086 | 5.1209 | <b>0.0063</b> |
| NOSTRIN | 0.4488 | 0.2776 | 0.7257 | <b>0.0011</b> |
| NPNT    | 0.5564 | 0.3608 | 0.8578 | <b>0.0079</b> |
| NT5E    | 1.4461 | 1.0696 | 1.9550 | <b>0.0165</b> |
| PBK     | 2.4445 | 1.4495 | 4.1224 | <b>0.0008</b> |
| PIGR    | 0.6999 | 0.5257 | 0.9318 | <b>0.0145</b> |
| PLD1    | 0.4995 | 0.2679 | 0.9312 | <b>0.0289</b> |
| PLIN2   | 1.8547 | 1.1181 | 3.0765 | <b>0.0167</b> |
| PLK1    | 3.4022 | 1.8387 | 6.2954 | <b>0.0001</b> |
| PLXNA1  | 3.8988 | 1.9778 | 7.6854 | <b>0.0001</b> |
| PROX1   | 0.5337 | 0.3321 | 0.8579 | <b>0.0095</b> |
| PXDN    | 1.6000 | 1.0596 | 2.4160 | <b>0.0254</b> |
| RACGAP1 | 3.4699 | 1.8410 | 6.5401 | <b>0.0001</b> |
| RAI14   | 3.1256 | 1.6500 | 5.9208 | <b>0.0005</b> |
| SEMA7A  | 2.5271 | 1.4955 | 4.2704 | <b>0.0005</b> |
| SLC11A1 | 1.8646 | 1.2224 | 2.8443 | <b>0.0038</b> |
| SLC16A3 | 2.9905 | 1.6623 | 5.3799 | <b>0.0003</b> |
| SLC20A1 | 2.9835 | 1.5057 | 5.9118 | <b>0.0017</b> |
| SLC2A1  | 1.7957 | 1.2692 | 2.5404 | <b>0.0009</b> |
| SOX6    | 0.5235 | 0.2913 | 0.9406 | <b>0.0304</b> |
| TGFBI   | 1.7706 | 1.1533 | 2.7181 | <b>0.0090</b> |
| TNC     | 1.3687 | 1.0734 | 1.7453 | <b>0.0114</b> |
| WFDC2   | 1.8893 | 1.1343 | 3.1468 | <b>0.0145</b> |

---

Table S6: List of 35 inflammatory genes associated with survival by Kaplan-Meier analysis

| gene symbols | Coxregression |        |        | Kaplan-Meier( log rank) |                   |
|--------------|---------------|--------|--------|-------------------------|-------------------|
|              | Hratio        | LowCI  | UpCI   | p-value(gene)           | p value           |
| ADM          | 1.6434        | 1.1411 | 2.3670 | <b>0.0076</b>           | <b>0.0166</b>     |
| AQP9         | 1.4500        | 1.0450 | 2.0120 | <b>0.0262</b>           | <b>0.0209</b>     |
| ASPM         | 1.7248        | 1.1795 | 2.5222 | <b>0.0049</b>           | <b>0.0178</b>     |
| CCNB2        | 2.0442        | 1.2086 | 3.4576 | <b>0.0077</b>           | <b>0.0050</b>     |
| CD151        | 3.4071        | 1.5644 | 7.4205 | <b>0.0020</b>           | <b>0.0457</b>     |
| CDK1         | 2.2211        | 1.3174 | 3.7449 | <b>0.0028</b>           | <b>0.0125</b>     |
| CHN2         | 0.3481        | 0.1815 | 0.6677 | <b>0.0015</b>           | <b>0.0009</b>     |
| CHST4        | 0.4149        | 0.2113 | 0.8148 | <b>0.0106</b>           | <b>0.0116</b>     |
| DKK1         | 1.6110        | 1.1528 | 2.2514 | <b>0.0052</b>           | <b>0.0095</b>     |
| ECT2         | 1.9834        | 1.2782 | 3.0777 | <b>0.0023</b>           | <b>0.0104</b>     |
| EFNB2        | 1.6579        | 1.1168 | 2.4609 | <b>0.0121</b>           | <b>0.0078</b>     |
| ENO1         | 2.2803        | 1.3548 | 3.8380 | <b>0.0019</b>           | <b>0.0035</b>     |
| GATM         | 0.8102        | 0.6664 | 0.9851 | <b>0.0348</b>           | <b>0.0110</b>     |
| GPR109B      | 1.6127        | 1.0665 | 2.4384 | <b>0.0235</b>           | <b>0.0104</b>     |
| IGF2BP3      | 1.9034        | 1.3279 | 2.7284 | <b>0.0005</b>           | <b>0.0017</b>     |
| ITGB3        | 2.0071        | 1.3201 | 3.0515 | <b>0.0011</b>           | <b>0.0422</b>     |
| ITGB4        | 1.7494        | 1.1773 | 2.5993 | <b>0.0056</b>           | <b>0.0230</b>     |
| ITGB8        | 1.9232        | 1.1801 | 3.1344 | <b>0.0087</b>           | <b>0.0275</b>     |
| MFI2         | 2.0695        | 1.2723 | 3.3664 | <b>0.0034</b>           | <b>0.0033</b>     |
| MUC6         | 0.7507        | 0.5793 | 0.9729 | <b>0.0302</b>           | <b>0.0390</b>     |
| NCAPD2       | 3.5113        | 1.9088 | 6.4593 | <b>0.0001</b>           | <b>0.0046</b>     |
| NET1         | 2.5886        | 1.3086 | 5.1209 | <b>0.0063</b>           | <b>0.0080</b>     |
| NOSTRIN      | 0.4488        | 0.2776 | 0.7257 | <b>0.0011</b>           | <b>0.0089</b>     |
| NT5E         | 1.4461        | 1.0696 | 1.9550 | <b>0.0165</b>           | <b>0.0072</b>     |
| PBK          | 2.4445        | 1.4495 | 4.1224 | <b>0.0008</b>           | <b>0.0133</b>     |
| PLIN2        | 1.8547        | 1.1181 | 3.0765 | <b>0.0167</b>           | <b>0.0356</b>     |
| PLK1         | 3.4022        | 1.8387 | 6.2954 | <b>0.0001</b>           | <b>0.0002</b>     |
| PROX1        | 0.5337        | 0.3321 | 0.8579 | <b>0.0095</b>           | <b>0.0330</b>     |
| RACGAP1      | 3.4699        | 1.8410 | 6.5401 | <b>0.0001</b>           | <b>&lt;0.0001</b> |
| RAI14        | 3.1256        | 1.6500 | 5.9208 | <b>0.0005</b>           | <b>0.0086</b>     |
| SEMA7A       | 2.5271        | 1.4955 | 4.2704 | <b>0.0005</b>           | <b>0.0055</b>     |
| SLC16A3      | 2.9905        | 1.6623 | 5.3799 | <b>0.0003</b>           | <b>0.0131</b>     |
| SLC20A1      | 2.9835        | 1.5057 | 5.9118 | <b>0.0017</b>           | <b>0.0052</b>     |
| TGFBI        | 1.7706        | 1.1533 | 2.7181 | <b>0.0090</b>           | <b>0.0264</b>     |
| TNC          | 1.3687        | 1.0734 | 1.7453 | <b>0.0114</b>           | <b>0.0420</b>     |



Table S7: Univariable and Multivariable Cox-Regression Analysis

| Variables<br>(Comparison/referent) | Univariable Cox<br>Regression |              | Multivariable Cox<br>Regression |              |
|------------------------------------|-------------------------------|--------------|---------------------------------|--------------|
|                                    | HR (95% CI)                   | P-<br>value  | HR (95% CI)                     | P-value      |
| NOSTRIN (high/low)                 | 0.45 (0.28-0.73)              | <b>0.001</b> | 0.54 (0.30-0.96)                | <b>0.035</b> |
| Resection Margin<br>(R1/R0)        | 1.56 (0.79-3.67)              | 0.793        |                                 |              |
| Grading (G3&4/G1&2)                | 1.79 (1.06-3.02)              | <b>0.030</b> | 1.34 (0.74-2.41)                | 0.332        |
| Stage (IIB/I, IIA)                 | 0.77 (0.29-2.00)              | 0.588        |                                 |              |
